# Supplementary material
Source: publisher figshare collection journal article supplement (https://acs.figshare.com/ndownloader/files/6010980)

Supporting information for:

Impact of  $\text{Li}_2\text{O}_2$  Particle Size on Li- $\text{O}_2$  Battery

Charge Process: Insights from a Multi-Scale

Modeling Perspective

by

*Yinghui Yin<sup>a,b</sup>, Caroline Gaya<sup>a,c</sup>, Amangeldi Torayev<sup>a,d</sup>, Vigneshwaran Thangavel<sup>a,b</sup>  
and Alejandro A. Franco<sup>a,b,d,\*</sup>*

<sup>a</sup> Laboratoire de Réactivité et Chimie des Solides (LRCS), Université de Picardie Jules Verne  
and CNRS, UMR 7314 – 33 rue St. Leu, 80039 Amiens, France

<sup>b</sup> Réseau sur le Stockage Electrochimique de l'Energie (RS2E), FR CNRS 3459, 33 rue St.  
Leu, 80039 Amiens Cedex, France

<sup>c</sup> IRT Saint-Exupery, 118 route de Narbonne, 31432 Toulouse, France

<sup>d</sup> ALISTORE European Research Institute, Fédération de Recherche CNRS 3104, 33 rue  
Saint Leu, 80039 Amiens Cedex, France

[\\*E-mail : alejandro.franco@u-picardie.fr](mailto:alejandro.franco@u-picardie.fr)

Table S1: Parameters values implemented in the model

| Parameters                                                                       | Values                 | Units                                       | Sources                   |
|----------------------------------------------------------------------------------|------------------------|---------------------------------------------|---------------------------|
| Physical constants                                                               |                        |                                             |                           |
| Gas constant                                                                     | 8.31                   | $\text{J.K}^{-1}.\text{mol}^{-1}$           | <i>universal value</i>    |
| Faraday constant                                                                 | 96485                  | $\text{C.mol}^{-1}$                         | <i>universal value</i>    |
| Boltzmann constant                                                               | $1.38 \times 10^{-23}$ | $\text{m}^2.\text{kg.s}^{-2}.\text{K}^{-1}$ | <i>universal value</i>    |
| Planck constant                                                                  | $6.62 \times 10^{-34}$ | $\text{m}^2.\text{kg.s}^{-1}$               | <i>universal value</i>    |
| Bruggeman coefficient                                                            | 1.5                    | /                                           | <i>universal value</i>    |
| Cell parameters                                                                  |                        |                                             |                           |
| Cathode thickness                                                                | $4.86 \times 10^{-5}$  | m                                           | <i>Ref 1</i>              |
| Electrode (carbon) specific surface area                                         | $7.68 \times 10^9$     | $\text{m}^2.\text{m}^{-3}$                  | <i>adapted from Ref 1</i> |
| Carbon volume fraction in the cathode                                            | $1.65 \times 10^{-1}$  | /                                           | <i>adapted from Ref 1</i> |
| Pristine cathode porosity                                                        | 0.791                  | /                                           | <i>adapted from Ref 1</i> |
| Separator porosity                                                               | 0.5                    | /                                           | <i>Assumed</i>            |
| $\text{Li}^+$ initial concentration                                              | $1 \times 10^3$        | $\text{mol.m}^{-3}$                         | <i>Ref 1</i>              |
| $\text{O}_2$ initial concentration                                               | 4.43                   | $\text{mol.m}^{-3}$                         | <i>Ref 2</i>              |
| $\text{LiO}_{2(\text{ip})}$ initial concentration                                | 1                      | $\text{mol.m}^{-3}$                         | <i>Assumed</i>            |
| $\text{LiO}_{2(\text{s})}$ , $\text{Li}_2\text{O}_2$ molar volume                | $1.98 \times 10^{-5}$  | $\text{m}^3.\text{mol}^{-1}$                | <i>Ref 3</i>              |
| Initial volume fraction of $\text{Li}_2\text{O}_{2(\text{f})}$                   | 0.122                  | /                                           | <i>Assumed</i>            |
| Initial thin-film $\text{Li}_2\text{O}_{2(\text{f})}$ particles radius ( $r_f$ ) | $7 \times 10^{-9}$     | m                                           | <i>Ref 4</i>              |
| Initial large $\text{Li}_2\text{O}_{2(\text{p})}$ particles radius ( $r_p$ )     | $75 \times 10^{-9}$    | m                                           | <i>adapted from Ref 5</i> |
| $\text{LiO}_{2(\text{s})}$ monolayer thickness                                   | $3 \times 10^{-10}$    | m                                           | <i>Assumed</i>            |
| $\text{Li}^+$ diffusion coefficient                                              | $1 \times 10^{-9}$     | $\text{m}^2.\text{s}^{-1}$                  | <i>Ref 1</i>              |
| $\text{O}_2$ diffusion coefficient                                               | $1.67 \times 10^{-9}$  | $\text{m}^2.\text{s}^{-1}$                  | <i>Ref 2</i>              |
| $\text{LiO}_{2(\text{ip})}$ diffusion coefficient                                | $1.3 \times 10^{-9}$   | $\text{m}^2.\text{s}^{-1}$                  | <i>Assumed</i>            |
| Absolute temperature                                                             | 298                    | K                                           | <i>Defined</i>            |
| Electrochemical parameters                                                       |                        |                                             |                           |
| Charging rate                                                                    | 1                      | $\text{A.m}^{-2}_{\text{geometric}}$        | <i>Ref 1</i>              |
| Equilibrium potential reaction 1                                                 | 3.4                    | V                                           | <i>Ref 3</i>              |
| Equilibrium potential reaction 2                                                 | 2.96                   | V                                           | <i>Ref 6</i>              |
| Equilibrium potential reaction 3                                                 | 3.1                    | V                                           | <i>Ref 2</i>              |
| Equilibrium potential reaction 5                                                 | 0                      | V                                           | <i>Assumed</i>            |
| Charge transfer coefficients ( $\alpha$ ) in reaction 1                          | 0.4                    | /                                           | <i>fitted</i>             |

|                                                         |                       |                                      |                   |
|---------------------------------------------------------|-----------------------|--------------------------------------|-------------------|
| Charge transfer coefficients ( $\alpha$ ) in reaction 2 | 0.3                   | /                                    | <i>fitted</i>     |
| Charge transfer coefficients ( $\alpha$ ) in reaction 3 | 0.5                   | /                                    | <i>fitted</i>     |
| Charge transfer coefficients ( $\alpha$ ) in reaction 5 | 0.5                   | /                                    | <i>assumed</i>    |
| Surface tension ( $\sigma_{LiO_{2(s)}}$ )               | 10                    | J.m <sup>-2</sup>                    | <i>assumed</i>    |
| Kinetic parameters                                      |                       |                                      |                   |
| O <sub>2</sub> mass transfer coefficient                | $1 \times 10^{-4}$    | /                                    | <i>Fitted</i>     |
| Forward kinetic rate constant reaction 1                | $1 \times 10^{-11}$   | mol.s <sup>-1</sup> .m <sup>-2</sup> | <i>Fitted</i>     |
| Forward kinetic rate constant reaction 2                | $1 \times 10^{-10}$   | mol.s <sup>-1</sup> .m <sup>-2</sup> | <i>Fitted</i>     |
| Forward kinetic rate constant reaction 3                | $1 \times 10^{-8}$    | mol.s <sup>-1</sup> .m <sup>-2</sup> | <i>Fitted</i>     |
| Backward kinetic rate constant reaction 1               | $1 \times 10^{-3}$    | mol.s <sup>-1</sup> .m <sup>-2</sup> | <i>Calculated</i> |
| Backward kinetic rate constant reaction 2               | $1 \times 10^{-3}$    | mol.s <sup>-1</sup> .m <sup>-2</sup> | <i>Calculated</i> |
| Backward kinetic rate constant reaction 3               | $2.26 \times 10^{-6}$ | mol.s <sup>-1</sup> .m <sup>-2</sup> | <i>Calculated</i> |
| Numerical parameters                                    |                       |                                      |                   |
| Cathode number of bins                                  | 10                    | /                                    | <i>Defined</i>    |
| Separator number of bins                                | 5                     | /                                    | <i>Defined</i>    |

## Reference

- (1) Zhai, D.; Wang, H.-H.; Yang, J.; Lau, K. C.; Li, K.; Amine, K.; Curtiss, L. A. Disproportionation in Li–O<sub>2</sub> Batteries Based on a Large Surface Area Carbon Cathode. *J. Am. Chem. Soc.* **2013**, *135*, 15364–15372.
- (2) Laoire, C. O.; Mukerjee, S.; Abraham, K. M.; Plichta, E. J.; Hendrickson, M. A. Influence of Nonaqueous Solvents on the Electrochemistry of Oxygen in the Rechargeable Lithium–Air Battery. *J. Phys. Chem. C* **2010**, *114*, 9178–9186.
- (3) Kang, S.; Mo, Y.; Ong, S. P.; Ceder, G. A Facile Mechanism for Recharging Li<sub>2</sub>O<sub>2</sub> in Li–O<sub>2</sub> Batteries. *Chem. Mater.* **2013**, *25*, 3328–3336.
- (4) Viswanathan, V.; Thygesen, K. S.; Hummelshøj, J. S.; Nørskov, J. K.; Girishkumar, G.; McCloskey, B. D.; Luntz, A. C. Electrical Conductivity in Li<sub>2</sub>O<sub>2</sub> and Its Role in Determining Capacity Limitations in Non-Aqueous Li–O<sub>2</sub> Batteries. *J. Chem. Phys.* **2011**, *135*, 214704.
- (5) Lau, S.; Archer, L. A. Nucleation and Growth of Lithium Peroxide in the Li–O<sub>2</sub> Battery. *Nano Letters*, **2015**, *15*, 5995–6002.
- (6) Lu, J.; Amine, K. Recent Research Progress on Non-Aqueous Lithium-Air Batteries from Argonne National Laboratory. *Energies* **2013**, *6*, 6016–6044.

## Numerical method description

---

### a) Numerical description of the system

To solve numerically the governing equations, spatial and temporal discretizations are needed. The separator and the cathode are represented in one-dimension, and they are divided into several equal sized control volumes or bins. P and Q are the number of bins in the separator and cathode respectively. In the meantime, a sufficiently small time step for discretization leading to a reasonable computational time is required.

### b) Mass transport

Transport across the positive electrode of electroactive species solubilized in the electrolyte ( $\text{Li}^+$ ,  $\text{O}_2$  and  $\text{LiO}_{2(\text{ip})}$ ) is solved using Fick law

$$J_i = -D_{eff} \frac{\partial c_i}{\partial x}$$

[S1]

where  $D_{eff}$  is the effective diffusion coefficient and  $c_i$  is the concentration of a specie  $i$  in the electrolyte. In the porous media,  $D_{eff}$  is correlated with the porosity by

$$D_{eff} = D_0 \varepsilon^\beta \quad [S2]$$

where  $\varepsilon$  is the porosity of positive electrode or separator,  $\beta$  is the Bruggeman coefficient and  $D_0$  is the bulk diffusion coefficient. Thus the following equation is derived from the mass balance equation for species  $i$

$$\frac{\partial n_i}{\partial t} = -V \nabla J_i + \gamma_i V \quad [S3]$$

where  $V$  is the electrode volume,  $n_i$  is the quantity of the species in moles,  $\gamma_i$  is the source term, standing for the rate of consumption or generation rate of species from chemical or/and electrochemical reaction  $j$ ,

$$\boldsymbol{v}_i = \sum_j \boldsymbol{s}_{ij} \boldsymbol{v}_j \quad [\text{S4}]$$

where  $s_{ij}$  is the stoichiometric coefficient of the concerned species in reaction  $j$ ;  $v_j$  is the reaction rate for reaction  $j$ . For the electrochemical reactions,  $v_j$  is obtained with

$$\boldsymbol{v}_j = \frac{A_j i_j^{far}}{V n_e F}$$

[S5]

$n_i$  in equation [S3] is related to the concentration  $c$  through

$$\boldsymbol{n}_i = \boldsymbol{c} V_{electrolyte} = \boldsymbol{c} \boldsymbol{\varepsilon} V$$

[S6]

Combining Eq. S1 and S3, the mass balance equation of specie  $i$ , can be rewritten as

$$\frac{\partial \boldsymbol{z}_i}{\partial t} = \frac{\partial}{\partial x} \left( \boldsymbol{\varepsilon}^\beta \boldsymbol{D}_0 \frac{\partial \boldsymbol{c}_i}{\partial x} \right) + \boldsymbol{v}_i$$

[S7]

$$\boldsymbol{z} = \boldsymbol{\varepsilon} \boldsymbol{c} \quad [\text{S8}]$$

where a new variable  $\boldsymbol{z}$  is introduced as apparent concentration. The above partial differential equation is solved by using the finite volume method.

At the gas/electrolyte interphase, we adopt as boundary condition the flux of the releasing  $\text{O}_2$  in a similar way as in our previously reported models on water electrolyzers [L. F. L. Oliveira *et al.*, Phys. Chem. Chem. Phys., **14** (2012), 10215; L. F. L. Oliveira *et al.*, Electrochim. Acta, **110** (2003), 363]

$$\boldsymbol{\vartheta}_{\text{O}_2} = \boldsymbol{K}(\boldsymbol{c}_{\text{O}_2} - \boldsymbol{H}_p \boldsymbol{P}_{\text{O}_2}) \text{ at } \boldsymbol{x} = \boldsymbol{P} + \boldsymbol{Q} \quad [\text{S9}]$$

where  $\boldsymbol{K}$  is the interface mass transfer coefficient,  $\boldsymbol{H}_p$  is the Henry constant and  $\boldsymbol{P}_{\text{O}_2}$  is the partial pressure of  $\text{O}_2$  in gas phase. The fluxes of the other species are zero at this interface.

The boundary condition at the separator/cathode interface ( $\boldsymbol{x} = \boldsymbol{L}_{sep}$ ) assumes continuity of the fluxes of all the species, i.e. we have

$$\boldsymbol{\vartheta}_{i,sep} = \boldsymbol{\vartheta}_{i,cat} \text{ at } \boldsymbol{x} = \boldsymbol{P} \quad [\text{S10}]$$

As for the anode/separator interface ( $x = 0$ ), only the flux of  $Li_{(l)}^+$  is considered to be non-zero, given by

$$\boldsymbol{\vartheta}_{Li^+} = -\frac{i_5^{Far}}{F} \quad \text{at} \quad \boldsymbol{x} = \mathbf{0} \quad [\text{S11}]$$

where  $i_5^{Far}$  is the current density of the  $Li_{(l)}^+$  reduction reaction at the anode (Eq. S5). According to the adopted convention, the sign of the current flux in Eq. S11 is negative, since the flux of electron enters the anode during reduction.

### c) Porosity and particle size evolution

During the recharge process, the continuous oxidation of  $Li_2O_2$  leads to the evolution of their particle sizes as well as the electrode porosity. Together with the molar volume ( $\omega$ ) of  $Li_2O_2$  and  $LiO_2$ , the volume change of particles in the  $i^{\text{th}}$  bin can be obtained from

$$\frac{\partial V_{p,i}}{\partial t} = \frac{\omega_{Li_2O_2}}{N_{p,i}V_i} \frac{\partial n_{Li_2O_2(p),i}}{\partial t} + \frac{\omega_{LiO_2(s)}}{N_{p,i}V_i} \frac{\partial n_{LiO_2(s),i}}{\partial t} \quad [\text{S12}]$$

$$\frac{\partial V_{f,i}}{\partial t} = \frac{\omega_{Li_2O_2}}{N_{f,i}V_i} \frac{\partial n_{Li_2O_2(f),i}}{\partial t} \quad [\text{S13}]$$

where the consumption rate ( $\frac{\partial n}{\partial t}$ ) is calculated from Eq. S3 by neglecting the diffusive term since the solid species are immobile and  $V_i$  is the volume of the  $i^{\text{th}}$  bin. Therefore, the porosity change in the  $i^{\text{th}}$  bin can be calculated from

$$\frac{\partial \varepsilon_i}{\partial t} = -(N_{p,i} \frac{\partial V_{p,i}}{\partial t} + N_{f,i} \frac{\partial V_{f,i}}{\partial t}) \quad [\text{S14}]$$

Chart S1: Model flow chart

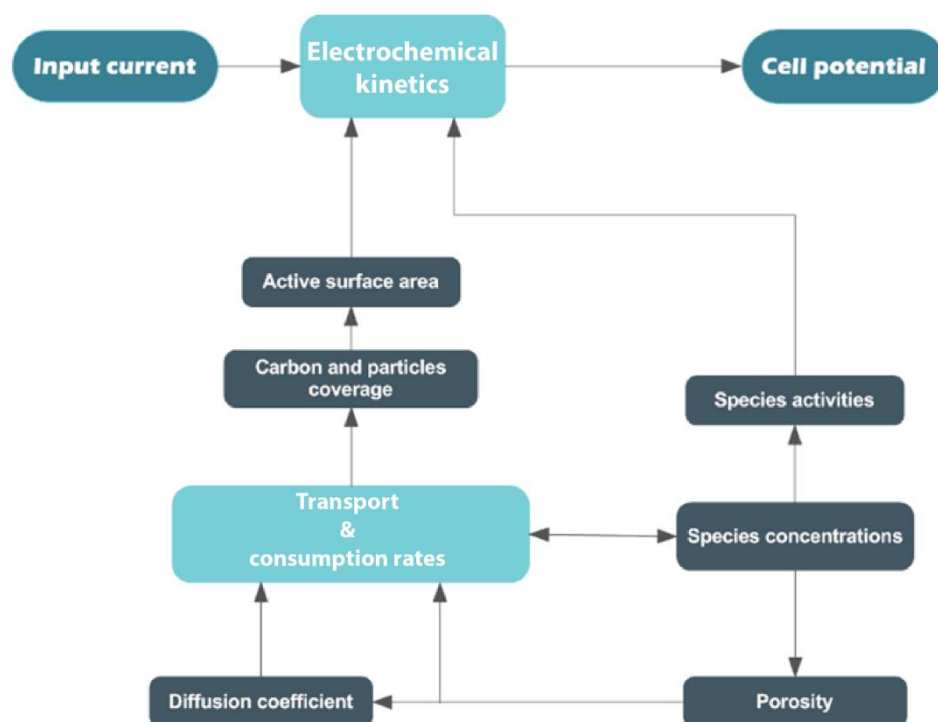

Supplement: Supplementary file 1 [file 6010980]
